# Supplementary material for: Model of vaccine efficacy against HSV-2 superinfection of HSV-1 seropositive mice demonstrates protection by antibodies mediating cellular cytotoxicity
Source: PubMed Central journal article supplement (PMC7206093; doi:10.1038/s41541-020-0184-7), 2020-05-07
Supplement: 41541_2020_184_MOESM1_ESM.pdf [file 41541_2020_184_MOESM1_ESM.pdf]

| Name                              | Sequence (5'-3')            |
|-----------------------------------|-----------------------------|
| HSV-1 gB forward primer           | GCAGTTTACGTACAACCACATACAGC  |
| HSV-2 gB forward primer           | TGCAGTTTACGTATAACCACATACAGC |
| HSV-1 and HSV-2 gB reverse primer | AGCTTGCGGGCCTCGTT           |
| HSV-1 gB probe                    | CGGCCCAACATATCGTTGACATGGC   |
| HSV-2 gB probe                    | CGCCCAGCATGTCGTTACGT        |

**Supplementary Table 1.** HSV-specific primer and probe sequences for qPCR.
